# Supplementary material for: Tuning the interface of Ru/TiO2 with P for enhancing the hydrodeoxygenation of m-cresol
Source: Royal Society of Chemistry journal article supplement (doi:10.1039/d4cy00512k), 2024-01-01
Supplement: d4cy00512k1.pdf [file d4cy00512k1.pdf]

Table S1 Summary of the catalytic data of Ru-based catalysts used in m-cresol hydrodeoxygenation reaction.

| Entry | Catalyst                                   | The flow of H <sub>2</sub> (mL/min) | Conversion (%) | Selectivity (%) |                   |                                   |
|-------|--------------------------------------------|-------------------------------------|----------------|-----------------|-------------------|-----------------------------------|
|       |                                            |                                     |                | Toluene         | methylcyclohexane | oxygenated compounds <sup>e</sup> |
| 1     | 5% Ru/TiO <sub>2</sub>                     | 5                                   | 0.3            | 60              | 20                | 20                                |
| 2     | 5% Ru/Al <sub>2</sub> O <sub>3</sub>       | 5                                   | 16             | 76              | 17                | 7                                 |
| 3     | 5% Ru/Nb <sub>2</sub> O <sub>5</sub>       | 5                                   | 88             | 96              | 3                 | 1                                 |
| 4     | 5% Ru/CeO <sub>2</sub>                     | 5                                   | 15             | 30              | 10                | 60                                |
| 5     | 5% Ru/ZrO <sub>2</sub>                     | 5                                   | 40             | 52              | 8                 | 40                                |
| 6     | 5% Ru/TiO <sub>2</sub> <sup>a</sup>        | 5                                   | 25             | 42              | 24                | 34                                |
| 7     | 5% Ru/TiO <sub>2</sub> <sup>b</sup>        | 5                                   | 1              | 75              | 20                | 5                                 |
| 8     | 5% Ru/TiO <sub>2</sub> -3.5%P <sup>c</sup> | 5                                   | 95             | 95              | 5                 | 0                                 |
| 9     | 5% Ru/TiO <sub>2</sub> -3.5%P <sup>d</sup> | 5                                   | 23             | 80              | 16                | 4                                 |

Reaction conditions: WHSV = 0.62 h<sup>-1</sup> (m-cresol), H<sub>2</sub> (0.1 MPa), 300 °C.

a: 5% Ru/TiO<sub>2</sub> was reduced by NaBH<sub>4</sub>;

b: 5% Ru/TiO<sub>2</sub> reduced by NaBH<sub>4</sub> and further reduced under H<sub>2</sub> atmosphere at 350 °C;

c: The reactant was changed to 10 wt% m-cresol in N-decane with the WHSV = 0.06 h<sup>-1</sup>;

d: The P was modified after 5%Ru/TiO<sub>2</sub> was reduced at 350 °C;

e: Methylcyclohexanone and methylcyclohexanol were summed as oxygenated compounds.

Table S2 The exact ratio between P and Ti.

| Sample                   | The mass fraction of P (wt%) |
|--------------------------|------------------------------|
| TiO <sub>2</sub>         | 0                            |
| P/TiO <sub>2</sub> =0.5  | 2.6                          |
| P/TiO <sub>2</sub> =0.75 | 2.9                          |
| P/TiO <sub>2</sub> =1    | 3.5                          |
| P/TiO <sub>2</sub> =1.5  | 4.8                          |

Table S3 The exact mass fraction of Ru on Ru-based catalysts

| Sample                       | The mass fraction of Ru (wt%) |
|------------------------------|-------------------------------|
| 5%Ru/TiO <sub>2</sub>        | 4.92                          |
| 5%Ru/TiO <sub>2</sub> -2.6%P | 4.89                          |
| 5%Ru/TiO <sub>2</sub> -3.5%P | 4.95                          |
| 5%Ru/TiO <sub>2</sub> -4.8%P | 5.01                          |

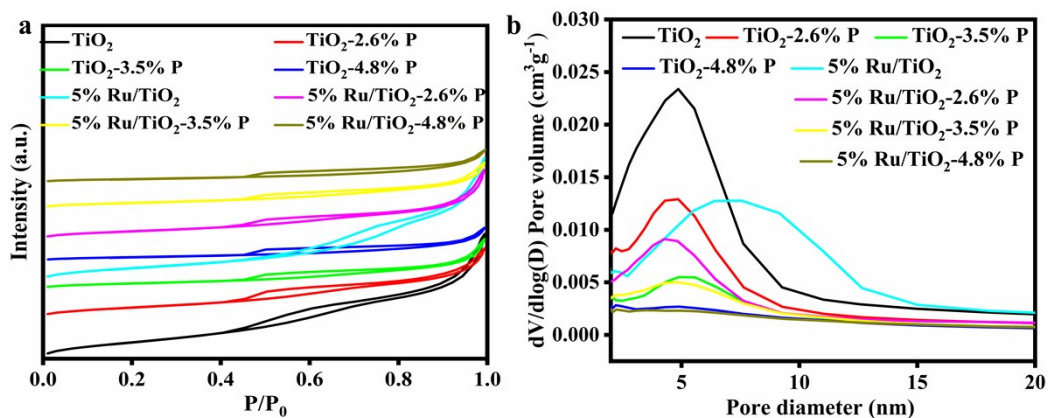

Figure S1 The results of (a) the N<sub>2</sub>-sorption and (b) the pore structure of TiO<sub>2</sub> and the modified TiO<sub>2</sub>.

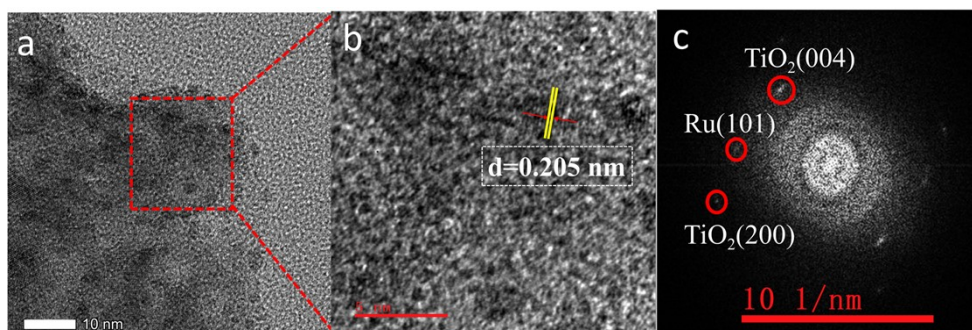

Figure S2 (a) TEM image of 5%Ru/TiO<sub>2</sub>-3.5%P; (b) the partial enlargement of image (a); (c) the FFT image of image (a).

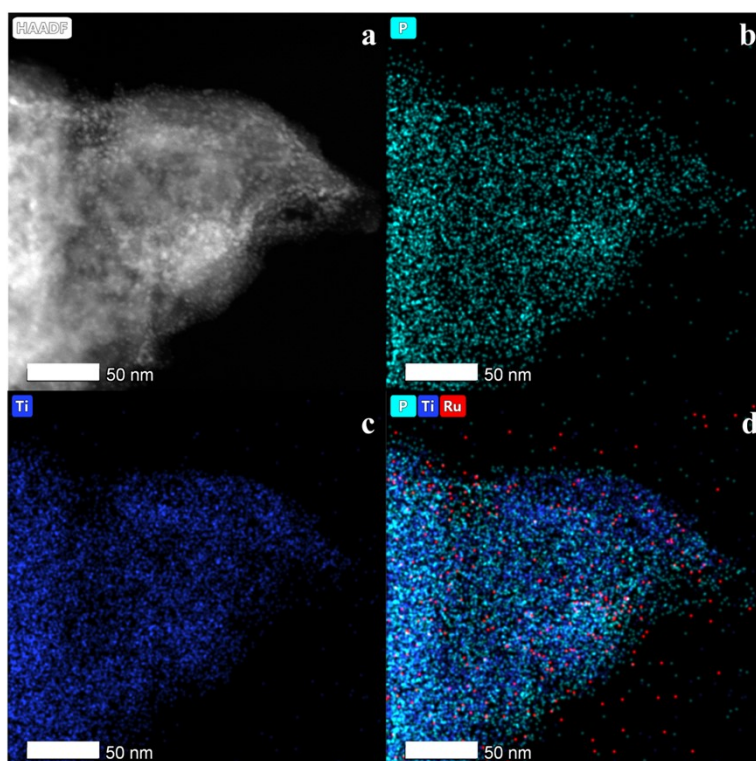

Figure S3 The HAADF images of 5%Ru/TiO<sub>2</sub>-3.5%P

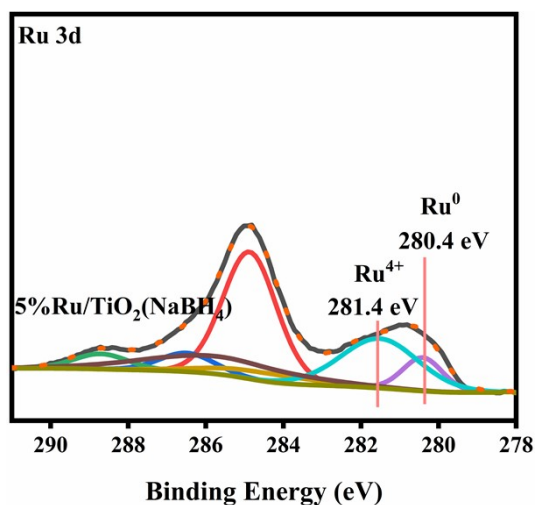

Figure S4 The XPS patterns of 5%Ru/TiO<sub>2</sub>(NaBH<sub>4</sub>).

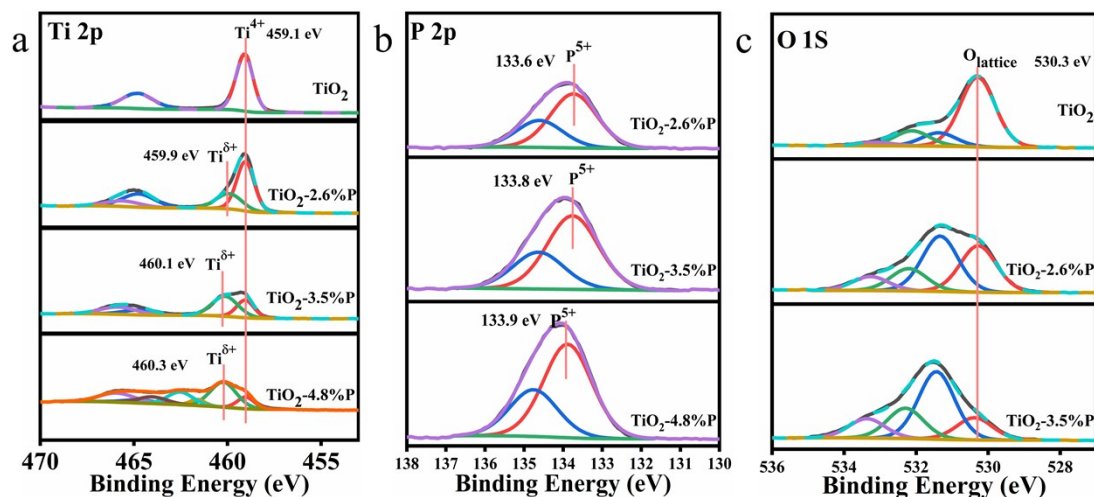

Figure S5 The XPS patterns of TiO<sub>2</sub>(P=n) (a) Ti 2p; (b) P 2p and (c) O 1s.

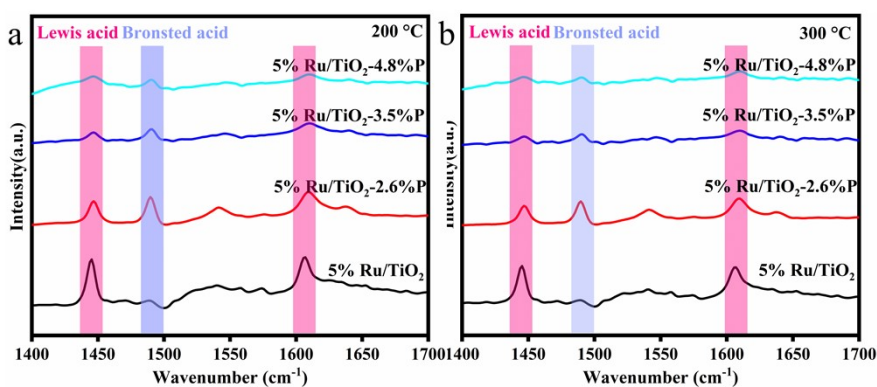

Figure S6 FTIR spectra of pyridine adsorption on Ru-based catalysts at 200 °C (a) and 300 °C (b).
